# Supplementary material for: Exploring the prospects of artificial intelligence in transforming dental care for special needs groups: A Scoping Review
Source: Research Square preprint supplement (doi:10.21203/rs.3.rs-7578245/v1), 2025-09-17
Supplement: Supplementary file 1 [file 7ad6b359090b9c9a47ebff37.docx]

**Identification of studies via databases**

Records removed before screening:

Duplicate records removed

(n =89)

Records identified from:

Databases (n = 477)

PubMed (n =105)

Google scholar(n=189)

Scopus (n = 101)

Web of Science (n = 82)

**Identification**

Records screened

(n =388)

Records excluded

(n = 294)

**Screening**

Reports excluded: (n = 89)

- Not complying with the inclusion criteria (n = 24)
- Lacking full text (n =4)
- Published in other languages (n =7)
- Irrelevant to the scope of this review (n = 54)

Eligibility assessed full- text articles

(n =94)

**Included**

Studies included in review

(n = 5)
